# Supplementary material for: Body Roundness Index and All-Cause Mortality Among US Adults
Source: PubMed Central journal article supplement (PMC11154161; doi:10.1001/jamanetworkopen.2024.15051), 2024-06-05
Supplement: jamanetwopen-e2415051-s001.pdf [file jamanetwopen-e2415051-s001.pdf]

## Supplemental Online Content

Zhang X, Ma N, Lin Q, et al. Body roundness index and all-cause mortality among US adults. *JAMA Netw Open*. 2024;7(6):e2415051.  
doi:10.1001/jamanetworkopen.2024.15051

**eTable 1.** Overall Unweighted Response Rate for Household Interview and Medical Examination, NHANES 1999-2000 to 2017-2018

**eTable 2.** Estimated Mean Values of BRI by Sociodemographic Factors in US Adults From the NHANES, 1999 to 2018

**eTable 3.** Adjusted HR of All-Cause Mortality According to the Quintiles of BMI

**eTable 4.** Adjusted HR of All-Cause Mortality According to the Quintiles of BRI After Excluding Accidental Deaths

**eTable 5.** Adjusted HR of All-Cause Mortality According to the Quintiles of BRI After Excluding Deaths Within 2 Years After Survey

**eTable 6.** Adjusted HR of All-Cause Mortality According to the Quintiles of BRI After Reserving Those Reporting a History of Myocardial Infarction, Stroke, Congestive Heart Failure, or Cancer

**eFigure 1.** Trends of Mean BRI Values in US Adults From the NHANES, 1999 to 2018

**eFigure 2.** Trends of BRI by Socioeconomic Factors in US Adults From 1999 to 2018.

**eFigure 3.** The Distribution Plot of  $\ln(-\ln(S(t)))$  Relative to  $\ln(t)$  for Assessing Cox Assumption of Body Roundness Index in Quintiles

**eFigure 4.** Adjusted HR of All-Cause Mortality by Sociodemographic Factors Comparing Quintile 1 and Quintile 5 with Quintile 3 of BRI in US Adults From the NHANES Linked Mortality Files, 1999 to 2018, in Fully Adjusted Model

**eFigure 5.** Adjusted HR of All-Cause Mortality by Sociodemographic Factors Comparing Quintile 1 With Quintile 3 of BRI in US Adults From the NHANES Linked Mortality Files, 1999 to 2018, After Adjusting For Only Age and Sex and in Partially Adjusted Model

**eFigure 6.** Adjusted HR of All-Cause Mortality by Sociodemographic Factors Comparing Quintile 1 With Quintile 3 of BRI in US Adults From the NHANES Linked Mortality Files, 1999 to 2018, After Adjusting for Only Age and Sex and in Partially Adjusted Model

**eFigure 7.** The Association Between Body Round Index and All-Cause Mortality Risk After Full Adjustment

This supplemental material has been provided by the authors to give readers additional information about their work.

**eTable 1. Overall unweighted response rate for household interview and medical examination, NHANES 1999-2000 to 2017-2018 (2-year cycles).**

| <b>Survey years</b> | <b>Unweighted response rate for household interview</b> | <b>Unweighted response rate for medical exam</b> |
|---------------------|---------------------------------------------------------|--------------------------------------------------|
| 1999-2000           | 76.62%                                                  | 69.83%                                           |
| 2001-2002           | 69.83%                                                  | 73.40%                                           |
| 2003-2004           | 72.87%                                                  | 69.06%                                           |
| 2005-2006           | 74.44%                                                  | 71.46%                                           |
| 2007-2008           | 73.76%                                                  | 71.11%                                           |
| 2009-2010           | 73.76%                                                  | 71.93%                                           |
| 2011-2012           | 67.97%                                                  | 65.22%                                           |
| 2013-2014           | 66.35%                                                  | 64.30%                                           |
| 2015-2016           | 64.30%                                                  | 64.30%                                           |
| 2017-2018           | 48.24%                                                  | 45.70%                                           |

Abbreviations: NHANES, National Health and Nutrition Examination Survey.

**eTable 2. Estimated Mean Values of BRI by Sociodemographic Factors in US Adults From the NHANES, 1999 to 2018.<sup>a</sup>**

| Subgroups               | BRI, weighted mean (95% CI) |                         |                         |                         |                         |                         |                         |                         |                         |                         | P for trend <sup>b</sup> |
|-------------------------|-----------------------------|-------------------------|-------------------------|-------------------------|-------------------------|-------------------------|-------------------------|-------------------------|-------------------------|-------------------------|--------------------------|
|                         | 1999-2000<br>(n = 2722)     | 2001-2002<br>(n = 3138) | 2003-2004<br>(n = 2954) | 2005-2006<br>(n = 3082) | 2007-2008<br>(n = 3653) | 2009-2010<br>(n = 3769) | 2011-2012<br>(n = 3389) | 2013-2014<br>(n = 3653) | 2015-2016<br>(n = 3407) | 2017-2018<br>(n = 3228) |                          |
| Age, yrs                |                             |                         |                         |                         |                         |                         |                         |                         |                         |                         |                          |
| 20-45                   | 4.38 (4.18, 4.59)           | 4.32 (4.19, 4.45)       | 4.64 (4.49, 4.80)       | 4.57 (4.34, 4.80)       | 4.70 (4.53, 4.88)       | 4.70 (4.52, 4.87)       | 4.76 (4.53, 5.00)       | 4.95 (4.74, 5.15)       | 5.07 (4.84, 5.31)       | 5.17 (4.88, 5.46)       | <0.001                   |
| 45-65                   | 5.28 (4.90, 5.66)           | 5.14 (4.93, 5.36)       | 5.23 (5.02, 5.45)       | 5.43 (5.17, 5.68)       | 5.47 (5.31, 5.63)       | 5.36 (5.18, 5.55)       | 5.60 (5.28, 5.91)       | 5.66 (5.47, 5.85)       | 5.77 (5.47, 6.07)       | 5.87 (5.55, 6.18)       | 0.001                    |
| ≥65                     | 5.61 (5.41, 5.81)           | 5.56 (5.43, 5.70)       | 5.72 (5.56, 5.88)       | 5.66 (5.50, 5.82)       | 5.66 (5.42, 5.89)       | 5.95 (5.70, 6.21)       | 5.82 (5.52, 6.12)       | 5.88 (5.58, 6.18)       | 6.12 (5.84, 6.41)       | 6.03 (5.81, 6.25)       | 0.005                    |
| Sex                     |                             |                         |                         |                         |                         |                         |                         |                         |                         |                         |                          |
| Female                  | 4.97 (4.70, 5.24)           | 4.84 (4.68, 5.00)       | 5.09 (4.91, 5.27)       | 5.10 (4.85, 5.35)       | 5.27 (5.10, 5.44)       | 5.30 (5.18, 5.41)       | 5.47 (5.27, 5.67)       | 5.62 (5.39, 5.85)       | 5.81 (5.54, 6.09)       | 5.86 (5.48, 6.23)       | <0.001                   |
| Male                    | 4.64 (4.44, 4.84)           | 4.64 (4.55, 4.74)       | 4.83 (4.69, 4.96)       | 4.89 (4.68, 5.10)       | 4.89 (4.78, 5.01)       | 4.87 (4.68, 5.07)       | 4.95 (4.73, 5.16)       | 5.01 (4.91, 5.10)       | 5.10 (4.85, 5.36)       | 5.22 (5.05, 5.40)       | <0.001                   |
| Race and Ethnicity      |                             |                         |                         |                         |                         |                         |                         |                         |                         |                         |                          |
| Mexican American        | 5.16 (4.98, 5.33)           | 5.04 (3.43, 6.65)       | 5.34 (4.16, 6.52)       | 5.25 (4.52, 5.99)       | 5.54 (5.46, 5.62)       | 5.6 (5.03, 6.16)        | 5.71 (5.11, 6.31)       | 5.85 (2.98, 8.72)       | 6.18 (6.00, 6.35)       | 6.07 (5.05, 7.08)       | <0.001                   |
| Non-Hispanic White      | 4.74 (4.28, 5.20)           | 4.71 (4.60, 4.82)       | 4.89 (3.25, 6.52)       | 4.96 (2.68, 7.23)       | 5.03 (4.45, 5.61)       | 5.02 (4.73, 5.30)       | 5.14 (4.84, 5.44)       | 5.30 (3.80, 6.80)       | 5.42 (2.46, 8.37)       | 5.54 (5.52, 5.56)       | <0.001                   |
| Non-Hispanic Black      | 4.92 (4.75, 5.09)           | 4.76 (1.75, 7.77)       | 5.34 (4.97, 5.70)       | 5.20 (3.73, 6.67)       | 5.29 (2.73, 7.86)       | 5.42 (5.21, 5.63)       | 5.57 (5.17, 5.98)       | 5.55 (5.27, 5.83)       | 5.54 (4.34, 6.73)       | 5.67 (4.91, 6.43)       | 0.004                    |
| Other race <sup>c</sup> | 4.87 (3.95, 5.79)           | 4.71 (3.52, 5.91)       | 4.73 (1.74, 7.72)       | 4.79 (3.47, 6.11)       | 4.86 (3.87, 5.85)       | 4.77 (4.64, 4.90)       | 4.94 (4.82, 5.06)       | 4.81 (4.80, 4.83)       | 5.18 (2.01, 8.34)       | 5.19 (5.06, 5.32)       | 0.03                     |
| Education               |                             |                         |                         |                         |                         |                         |                         |                         |                         |                         |                          |
| Less than 9th grade     | 5.22 (4.56, 5.89)           | 5.38 (2.47, 8.30)       | 5.38 (4.43, 6.33)       | 5.39 (4.83, 5.95)       | 5.59 (0.83, 10.35)      | 5.74 (5.32, 6.16)       | 5.87 (5.53, 6.21)       | 5.88 (4.36, 7.39)       | 6.00 (4.40, 7.60)       | 5.96 (4.65, 7.28)       | <0.001                   |
| 9-11th grade            | 5.29 (4.5, 6.09)            | 4.83 (2.83, 6.82)       | 5.22 (2.11, 8.34)       | 5.26 (2.74, 7.77)       | 5.33 (3.64, 7.01)       | 5.48 (5.31, 5.65)       | 5.55 (4.80, 6.31)       | 5.52 (3.02, 8.03)       | 5.81 (5.77, 5.86)       | 5.56 (0.43, 10.69)      | 0.002                    |

|                            |                   |                   |                   |                   |                   |                   |                   |                   |                   |                   |        |
|----------------------------|-------------------|-------------------|-------------------|-------------------|-------------------|-------------------|-------------------|-------------------|-------------------|-------------------|--------|
| High school graduate       | 5.01 (5.00, 5.02) | 4.88 (4.87, 4.90) | 5.27 (4.13, 6.41) | 5.25 (2.74, 7.76) | 5.34 (4.05, 6.64) | 5.29 (5.07, 5.51) | 5.63 (5.53, 5.73) | 5.53 (3.47, 7.58) | 5.68 (2.58, 8.78) | 5.85 (3.81, 7.89) | 0.001  |
| Some college               | 4.77 (4.46, 5.09) | 4.76 (4.16, 5.36) | 4.95 (4.48, 5.42) | 5.03 (4.51, 5.56) | 5.08 (4.99, 5.17) | 5.12 (4.97, 5.26) | 5.23 (4.78, 5.69) | 5.60 (5.00, 6.20) | 5.66 (4.56, 6.76) | 5.74 (5.71, 5.78) | <0.001 |
| College graduate or above  | 4.20 (3.85, 4.56) | 4.42 (3.89, 4.95) | 4.49 (2.65, 6.33) | 4.55 (2.05, 7.04) | 4.62 (3.46, 5.79) | 4.61 (4.45, 4.77) | 4.70 (4.61, 4.80) | 4.72 (4.56, 4.88) | 4.98 (1.73, 8.22) | 5.05 (3.28, 6.81) | <0.001 |
| Poverty impact ratio       |                   |                   |                   |                   |                   |                   |                   |                   |                   |                   |        |
| <1                         | 5.10 (4.84, 5.35) | 4.92 (4.66, 5.19) | 5.19 (4.81, 5.58) | 5.11 (4.79, 5.42) | 5.21 (4.91, 5.51) | 5.22 (4.92, 5.51) | 5.22 (4.82, 5.63) | 5.50 (5.17, 5.82) | 5.78 (5.48, 6.08) | 5.77 (5.27, 6.27) | <0.001 |
| ≥1                         | 4.76 (4.55, 4.97) | 4.72 (4.62, 4.81) | 4.93 (4.81, 5.05) | 4.98 (4.77, 5.19) | 5.07 (4.95, 5.19) | 5.06 (4.93, 5.20) | 5.20 (4.99, 5.41) | 5.28 (5.13, 5.43) | 5.42 (5.17, 5.66) | 5.51 (5.29, 5.73) | <0.001 |
| Cigarette smoking          |                   |                   |                   |                   |                   |                   |                   |                   |                   |                   |        |
| Yes                        | 4.86 (4.63, 5.09) | 4.74 (4.65, 4.84) | 4.98 (4.81, 5.15) | 4.93 (4.67, 5.20) | 5.09 (4.98, 5.19) | 5.08 (4.94, 5.21) | 5.26 (5.09, 5.42) | 5.41 (5.24, 5.58) | 5.64 (5.32, 5.95) | 5.72 (5.43, 6.01) | <0.001 |
| No                         | 4.75 (4.49, 5.01) | 4.74 (4.58, 4.89) | 4.95 (4.73, 5.16) | 5.05 (4.84, 5.26) | 5.08 (4.90, 5.27) | 5.09 (4.90, 5.28) | 5.17 (4.93, 5.41) | 5.24 (4.99, 5.50) | 5.34 (5.10, 5.58) | 5.42 (5.21, 5.63) | <0.001 |
| Alcohol drinking           |                   |                   |                   |                   |                   |                   |                   |                   |                   |                   |        |
| Yes                        | 4.67 (4.44, 4.90) | 4.56 (4.48, 4.65) | 4.80 (4.66, 4.93) | 4.85 (4.61, 5.08) | 4.93 (4.79, 5.06) | 4.95 (4.82, 5.08) | 5.10 (4.89, 5.31) | 5.21 (5.06, 5.36) | 5.34 (5.09, 5.6)  | 5.55 (5.32, 5.78) | <0.001 |
| No                         | 5.17 (4.92, 5.42) | 5.24 (4.94, 5.55) | 5.43 (5.18, 5.67) | 5.45 (5.13, 5.76) | 5.59 (5.41, 5.77) | 5.63 (5.43, 5.82) | 5.67 (5.49, 5.84) | 5.68 (5.35, 6.02) | 5.87 (5.60, 6.14) | 5.47 (4.88, 6.06) | 0.002  |
| Family history of CVD      |                   |                   |                   |                   |                   |                   |                   |                   |                   |                   |        |
| Yes                        | 4.86 (4.74, 4.98) | 5.01 (3.70, 6.32) | 5.24 (5.12, 5.35) | 5.36 (4.98, 5.73) | 5.47 (5.01, 5.93) | 5.59 (5.22, 5.96) | 5.76 (5.38, 6.15) | 5.78 (3.14, 8.41) | 6.29 (3.44, 9.13) | 6.25 (4.38, 8.13) | <0.001 |
| No                         | 4.80 (4.51, 5.09) | 4.71 (4.45, 4.97) | 4.93 (4.37, 5.49) | 4.93 (2.69, 7.17) | 5.03 (4.91, 5.16) | 5.02 (4.99, 5.06) | 5.13 (5.11, 5.15) | 5.25 (4.78, 5.72) | 5.35 (2.67, 8.03) | 5.45 (5.42, 5.47) | <0.001 |
| Family history of diabetes |                   |                   |                   |                   |                   |                   |                   |                   |                   |                   |        |
| Yes                        | 5.09 (4.78, 5.41) | 4.97 (4.83, 5.12) | 5.22 (5.05, 5.40) | 5.46 (5.19, 5.74) | 5.58 (5.43, 5.74) | 5.49 (5.36, 5.62) | 5.76 (5.55, 5.96) | 5.89 (5.61, 6.16) | 6.08 (5.82, 6.34) | 5.92 (5.56, 6.27) | <0.001 |

|    |                      |                      |                      |                      |                      |                      |                      |                      |                      |                      |        |
|----|----------------------|----------------------|----------------------|----------------------|----------------------|----------------------|----------------------|----------------------|----------------------|----------------------|--------|
| No | 4.53 (4.32,<br>4.75) | 4.51 (4.40,<br>4.61) | 4.69 (4.53,<br>4.85) | 4.68 (4.52,<br>4.85) | 4.78 (4.61,<br>4.96) | 4.86 (4.68,<br>5.03) | 4.91 (4.71,<br>5.11) | 4.97 (4.84,<br>5.10) | 5.04 (4.82,<br>5.26) | 5.25 (5.05,<br>5.44) | <0.001 |
|----|----------------------|----------------------|----------------------|----------------------|----------------------|----------------------|----------------------|----------------------|----------------------|----------------------|--------|

Abbreviations: NHANES, National Health and Nutrition Examination Survey; BRI, body roundness index; 95% CI, 95% confidence interval; CVD: cardiovascular disease.

<sup>a</sup> Nationally representative estimates of the nonpregnant US population aged 20 years or more. Estimates were nationally representative through the use of survey weights.

<sup>b</sup> P value for trend was calculated using the Mann-Kendall trend test within each subgroup.

<sup>c</sup> Other race included non-Hispanic Asian, American Indian or Alaska Native, and Native Hawaiian or Pacific Islander.

**eTable 3. Adjusted HR of All-Cause Mortality According to the Quintiles (Q1 to Q5) of BMI.<sup>a</sup>**

| Weibull Regression Model        | HR (95% CI)                      |                   |                 |                                |                                  |
|---------------------------------|----------------------------------|-------------------|-----------------|--------------------------------|----------------------------------|
|                                 | Q1                               | Q2                | Q3              | Q4                             | Q5                               |
| Range (13.18 to 82.10)          | 13.18 to <23.40                  | 23.40 to <26.39   | 26.40 to <29.30 | 29.31 to <33.50                | ≥33.51                           |
| Without adjustment              | 0.92 (0.80, 1.10)                | 0.91 (0.79, 1.04) | 1 [Ref]         | 1.10 (0.95, 1.27)              | 1.10 (0.93, 1.22)                |
| Adjusted only for age and sex   | 1.46 (1.28, 1.66) <sup>***</sup> | 1.05 (0.92, 1.19) | 1 [Ref]         | 1.16 (1.02, 1.33) <sup>*</sup> | 1.34 (1.17, 1.53) <sup>***</sup> |
| Partially adjusted <sup>b</sup> | 1.47 (1.29, 1.68) <sup>***</sup> | 1.07 (0.94, 1.21) | 1 [Ref]         | 1.15 (1.00, 1.31) <sup>*</sup> | 1.33 (1.16, 1.53) <sup>***</sup> |
| Fully adjusted <sup>c</sup>     | 1.44 (1.26, 1.64) <sup>***</sup> | 1.06 (0.93, 1.20) | 1 [Ref]         | 1.14 (0.99, 1.30)              | 1.31 (1.14, 1.51) <sup>***</sup> |

Abbreviations: HR, hazard ratio; 95% CI, 95% confidence interval; BMI, body mass index; Ref, reference.

<sup>a</sup>Data on US adults 20 years or older from the National Health and Nutrition Examination Survey Linked Mortality Files, 1999 to 2018. There were 3452 all-cause deaths in 32995 participants (329393 total person-years).

<sup>b</sup>Adjusted for age, sex, race/ethnicity, education, and income.

<sup>c</sup>Adjusted for age, sex, race/ethnicity, education, income, smoking, drinking, family history of cardiovascular disease, and family history of diabetes.

\*P < 0.05, \*\*P < 0.01, \*\*\*P < 0.001.

**eTable 4. Adjusted HR of All-Cause Mortality According to the Quintiles (Q1 to Q5) of BRI After Excluding Accidental Deaths.<sup>a</sup>**

| Weibull Regression Model        | HR (95% CI)          |                    |         |                      |                      |
|---------------------------------|----------------------|--------------------|---------|----------------------|----------------------|
|                                 | Q1                   | Q2                 | Q3      | Q4                   | Q5                   |
| Without adjustment              | 0.56 (0.47, 0.67)*** | 0.81 (0.69, 0.96)* | 1 [Ref] | 1.48 (1.29, 1.70)*** | 1.66 (1.44, 1.92)*** |
| Adjusted only for age and sex   | 1.22 (1.03, 1.47)*   | 1.12 (0.96, 1.30)  | 1 [Ref] | 1.30 (1.13, 1.50)*** | 1.61 (1.40, 1.88)*** |
| Partially adjusted <sup>b</sup> | 1.25 (1.04, 1.49)*   | 1.13 (0.98, 1.32)  | 1 [Ref] | 1.26 (1.09, 1.46)**  | 1.56 (1.35, 1.81)*** |
| Fully adjusted <sup>c</sup>     | 1.23 (1.03, 1.47)*   | 1.13 (0.97, 1.32)  | 1 [Ref] | 1.25 (1.08, 1.44)**  | 1.53 (1.33, 1.77)*** |

Abbreviations: HR, hazard ratio; 95% CI, 95% confidence interval; BRI, body roundness index; Ref, reference.

<sup>a</sup>Data on US adults 20 years or older from the National Health and Nutrition Examination Survey Linked Mortality Files, 1999 to 2018. After excluding accidental deaths, there were 3317 all-cause deaths in 32860 participants (328285 total person-years).

<sup>b</sup>Adjusted for age, sex, race/ethnicity, education and income.

<sup>c</sup>Adjusted for age, sex, race/ethnicity, education, income, smoking, drinking, family history of cardiovascular disease and family history of diabetes.

\*P < 0.05, \*\*P < 0.01, \*\*\*P < 0.001.

**eTable 5. Adjusted HR of All-Cause Mortality According to the Quintiles (Q1 to Q5) of BRI After Excluding Deaths within 2 years after Survey.<sup>a</sup>**

| Weibull Regression Model        | HR (95% CI)                      |                                |         |                                  |                                  |
|---------------------------------|----------------------------------|--------------------------------|---------|----------------------------------|----------------------------------|
|                                 | Q1                               | Q2                             | Q3      | Q4                               | Q5                               |
| Without adjustment              | 0.55 (0.47, 0.66) <sup>***</sup> | 0.81 (0.68, 0.95) <sup>*</sup> | 1 [Ref] | 1.47 (1.29, 1.69) <sup>***</sup> | 1.64 (1.43, 1.88) <sup>***</sup> |
| Adjusted only for age and sex   | 1.20 (1.01, 1.43) <sup>*</sup>   | 1.11 (0.94, 1.29)              | 1 [Ref] | 1.30 (1.12, 1.50) <sup>***</sup> | 1.59 (1.39, 1.84) <sup>***</sup> |
| Partially adjusted <sup>b</sup> | 1.25 (1.05, 1.49) <sup>*</sup>   | 1.13 (0.97, 1.33)              | 1 [Ref] | 1.24 (1.07, 1.44) <sup>**</sup>  | 1.53 (1.32, 1.76) <sup>***</sup> |
| Fully adjusted <sup>c</sup>     | 1.23 (1.03, 1.47) <sup>*</sup>   | 1.13 (0.97, 1.32)              | 1 [Ref] | 1.23 (1.06, 1.42) <sup>**</sup>  | 1.50 (1.31, 1.73) <sup>***</sup> |

Abbreviations: HR, hazard ratio; 95% CI, 95% confidence interval; BRI, body roundness index; Ref, reference.

<sup>a</sup>Data on US adults 20 years or older from the National Health and Nutrition Examination Survey Linked Mortality Files, 1999 to 2018. After excluding deaths within 2 years after survey, there were 3107 all-cause deaths in 32650 participants (329002 total person-years).

<sup>b</sup>Adjusted for age, sex, race/ethnicity, education and income.

<sup>c</sup>Adjusted for age, sex, race/ethnicity, education, income, smoking, drinking, family history of cardiovascular disease and family history of diabetes.

\*P < 0.05, \*\*P < 0.01, \*\*\*P < 0.001.



**eTable 6. Adjusted HR of All-Cause Mortality According to the Quintiles (Q1 to Q5) of BRI After reserving those reporting a history of myocardial infarction, stroke, congestive heart failure, or cancer.<sup>a</sup>**

| Weibull Regression Model        | HR (95% CI)                      |                                  |         |                                  |                                  |
|---------------------------------|----------------------------------|----------------------------------|---------|----------------------------------|----------------------------------|
|                                 | Q1                               | Q2                               | Q3      | Q4                               | Q5                               |
| Without adjustment              | 0.53 (0.47, 0.60) <sup>***</sup> | 0.76 (0.67, 0.86) <sup>***</sup> | 1 [Ref] | 1.38 (1.25, 1.53) <sup>***</sup> | 1.53 (1.38, 1.70) <sup>***</sup> |
| Adjusted only for age and sex   | 1.19 (1.05, 1.34) <sup>***</sup> | 1.02 (0.91, 1.15)                | 1 [Ref] | 1.26 (1.14, 1.40) <sup>***</sup> | 1.50 (1.34, 1.66) <sup>***</sup> |
| Partially adjusted <sup>b</sup> | 1.24 (1.10, 1.40) <sup>***</sup> | 1.06 (0.94, 1.18)                | 1 [Ref] | 1.22 (1.10, 1.36) <sup>***</sup> | 1.43 (1.29, 1.60) <sup>***</sup> |
| Fully adjusted <sup>c</sup>     | 1.22 (1.09, 1.37) <sup>***</sup> | 1.07 (0.95, 1.20)                | 1 [Ref] | 1.21 (1.09, 1.35) <sup>***</sup> | 1.40 (1.26, 1.56) <sup>***</sup> |

Abbreviations: HR, hazard ratio; 95% CI, 95% confidence interval; BRI, body roundness index; Ref, reference.

<sup>a</sup>Data on US adults 20 years or older from the National Health and Nutrition Examination Survey Linked Mortality Files, 1999 to 2018. After excluding accidental deaths, there were 5905 all-cause deaths in 39509 participants (380787 total person-years).

<sup>b</sup>Adjusted for age, sex, race/ethnicity, education and income.

<sup>c</sup>Adjusted for age, sex, race/ethnicity, education, income, smoking, drinking, family history of cardiovascular disease and family history of diabetes.

\*P < 0.05, \*\*P < 0.01, \*\*\*P < 0.001.

**eFigure 1. Trends of Mean BRI Values in US Adults From the NHANES, 1999 to 2018.<sup>a</sup>**

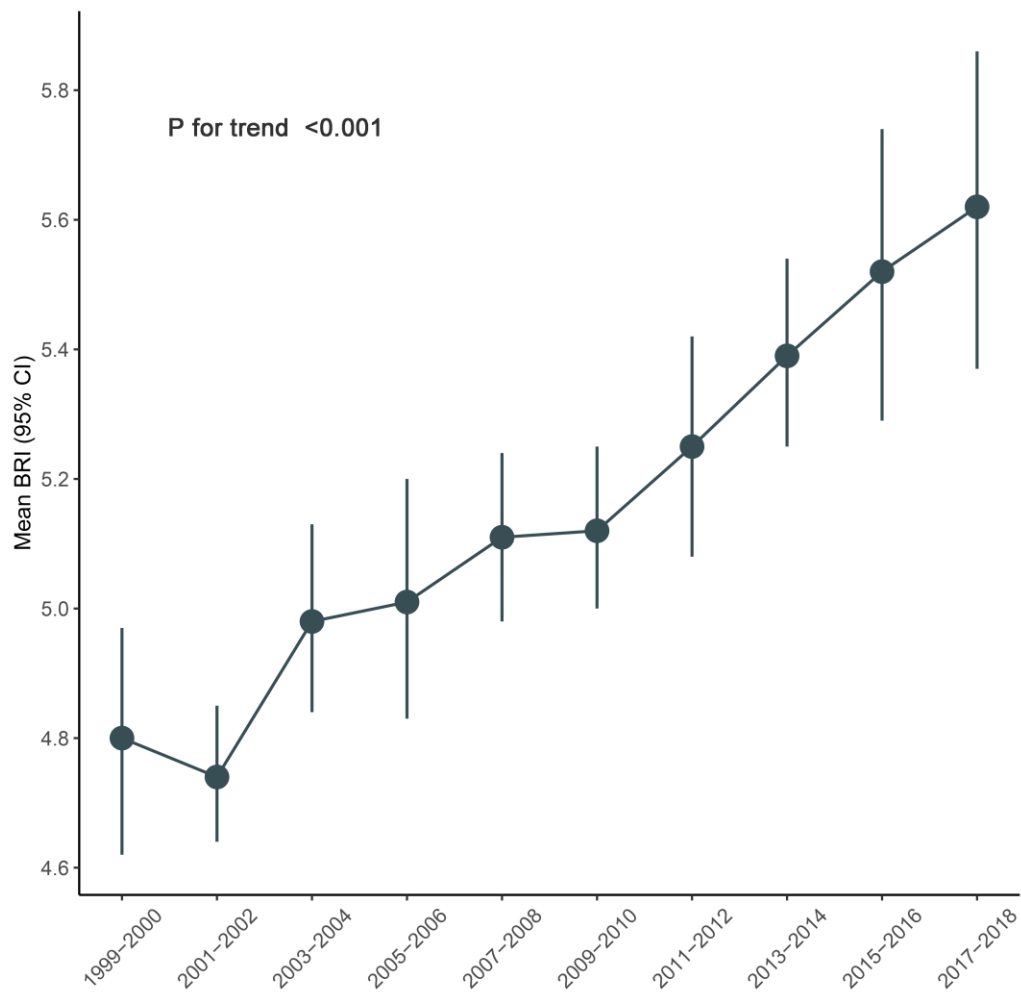

Abbreviations: BRI, body roundness index; NHANES, National Health and Nutrition Examination Survey; 95% CI, 95% confidence interval.

<sup>a</sup> Nationally representative estimates of the nonpregnant US population aged 20 years or more. Estimates were nationally representative through the use of survey weights.

Solid circle stands for mean BRI value of each NHANES cycle, and the upper and lower vertical extremes of each circles represents the corresponding 95% CI.

The y-axis does not necessarily start at 0 for clearer visualization of trends.

**eFigure 2. Trends of BRI by Socioeconomic Factors in US Adults From 1999 to 2018.**

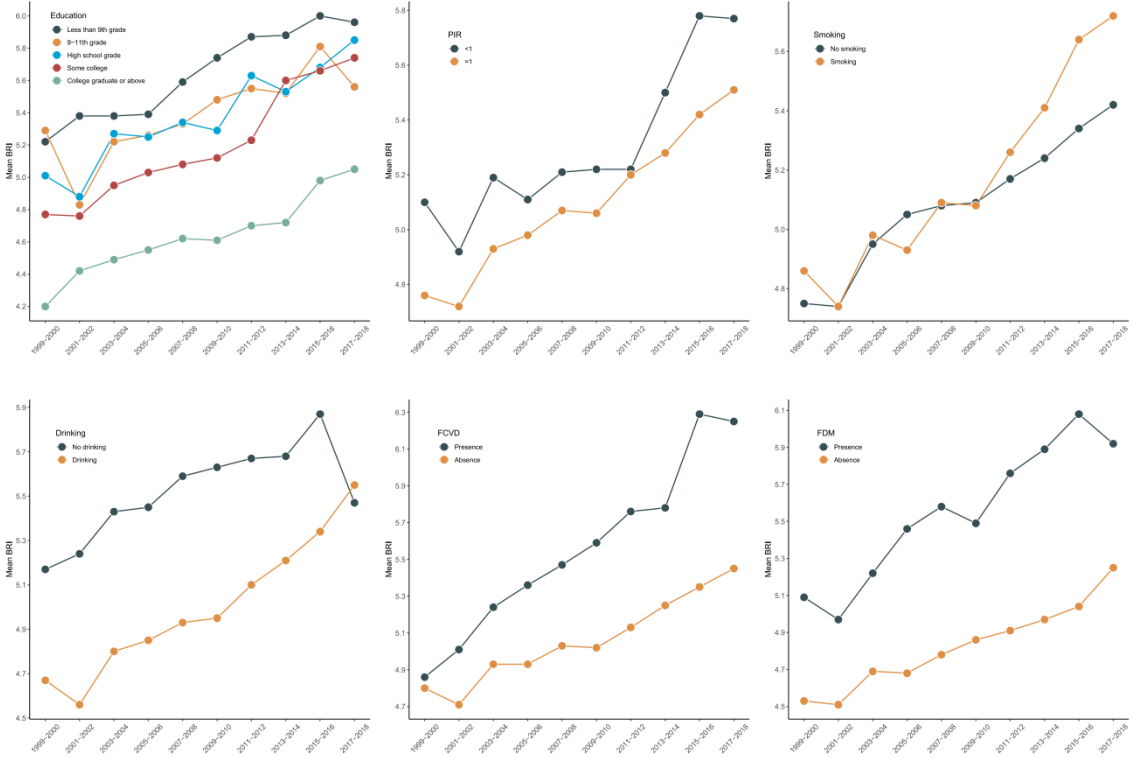

Abbreviations: BRI, body roundness index; PIR: poverty impact ratio; FCVD, family history of cardiovascular disease; FDM, family history of diabetes.

<sup>a</sup> Nationally representative estimates of the nonpregnant US population aged 20 years or more. Estimates were nationally representative through the use of survey weights.

The y-axis does not necessarily start at 0 for clearer visualization of trends. Solid circle stands for mean BRI value of each NHANES cycle.

**eFigure 3.** The distribution plot of  $\ln(-\ln(S(t)))$  relative to  $\ln(t)$  for assessing Cox assumption of body roundness index (BRI) in quintiles.

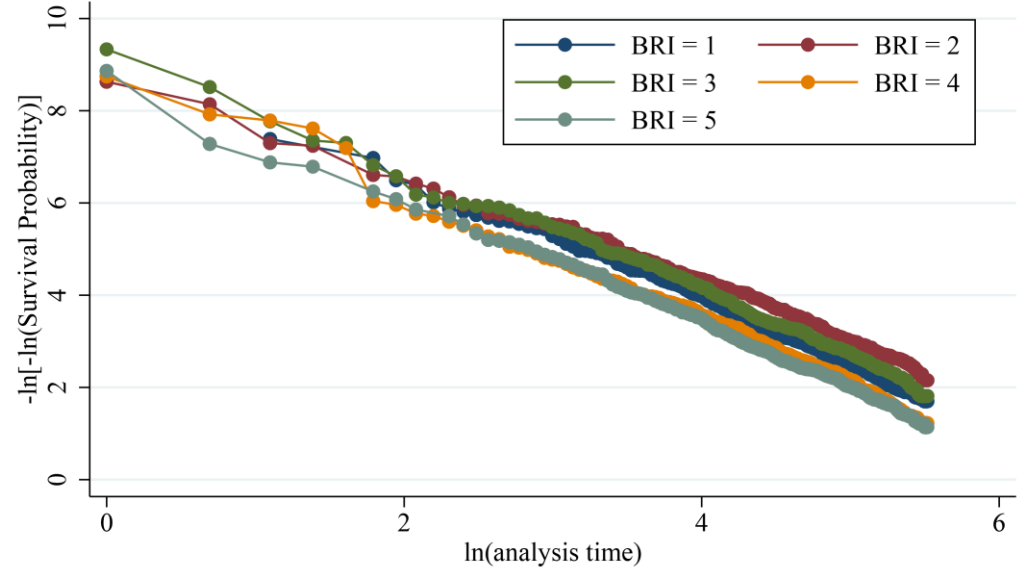

**eFigure 4. Adjusted HR of All-Cause Mortality by Sociodemographic Factors Comparing Quintile 1 (Q1) (Left Panel) and Quintile 5 (Q5) (Right Panel) with Quintile 3 (Q3) of BRI in US Adults from the NHANES Linked Mortality Files, 1999 to 2018, in Fully Adjusted Model.<sup>a</sup>**

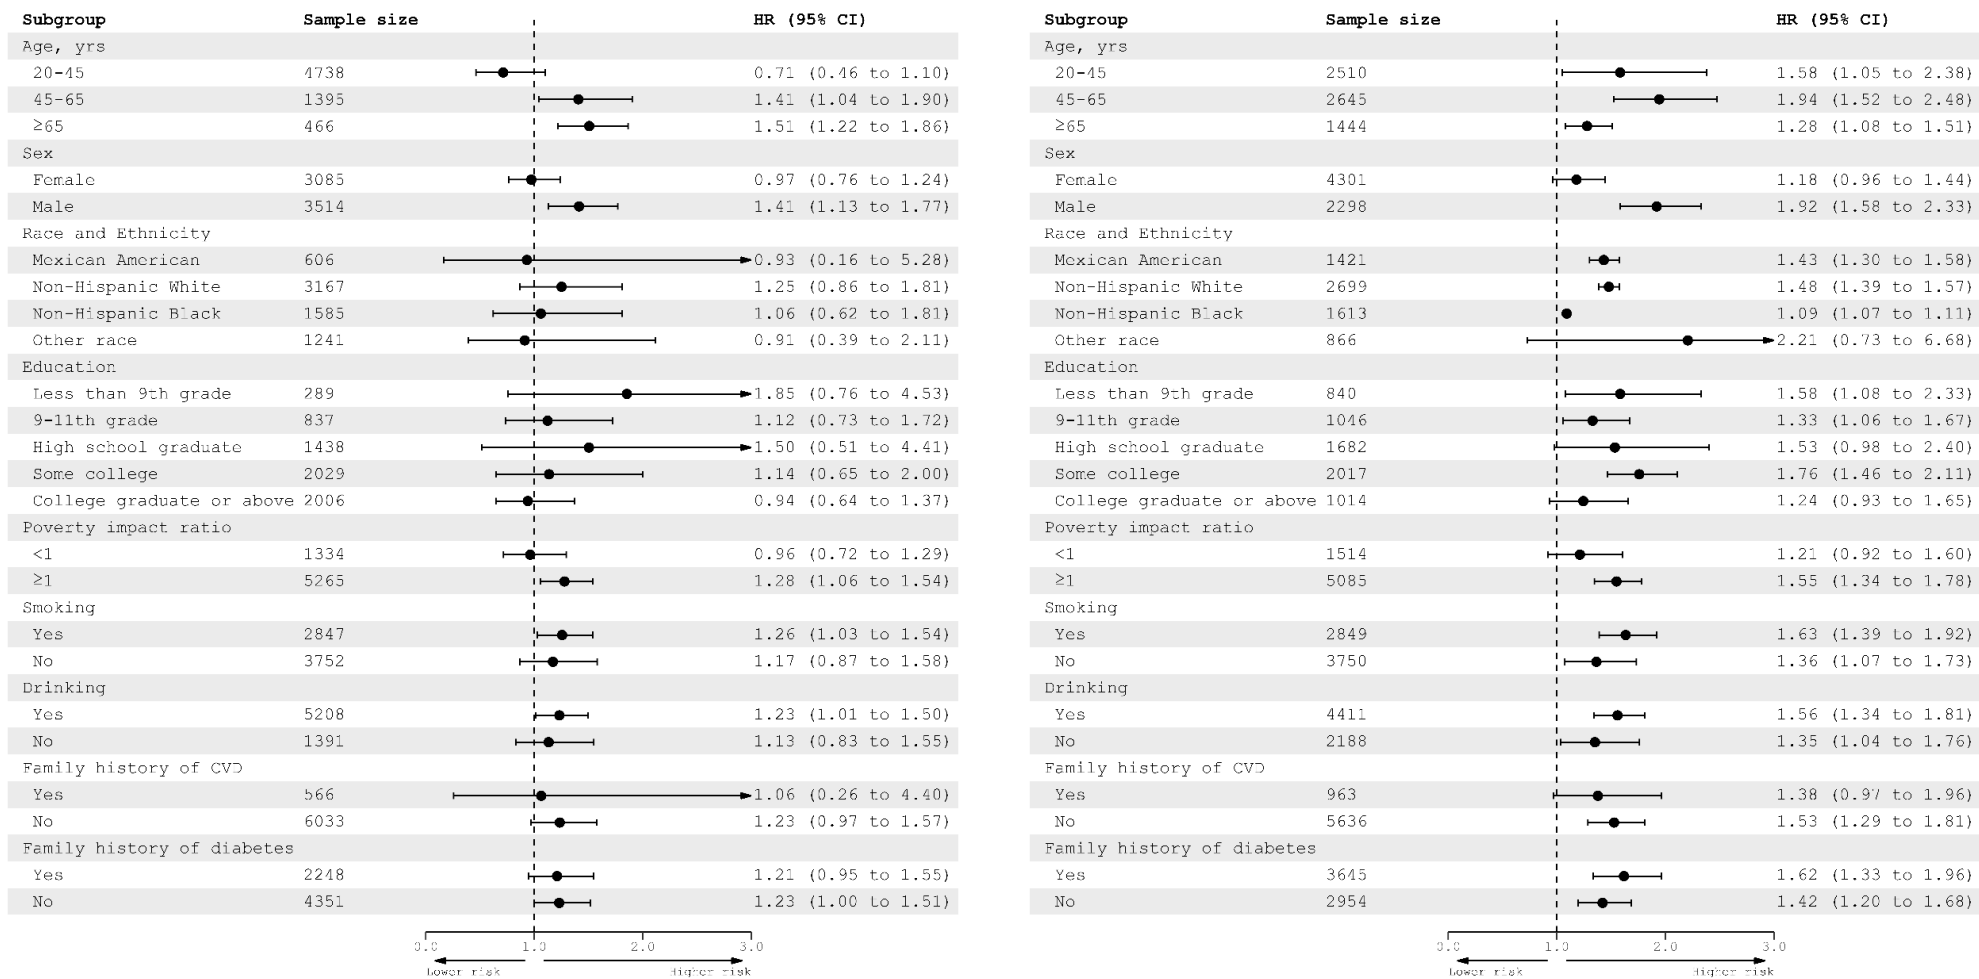

Abbreviations: BRI, body roundness index; NHANES, National Health and Nutrition Examination Survey; HR, hazard ratio; 95% CI, 95% confidence interval; CVD, cardiovascular disease.

<sup>a</sup> Estimates were nationally representative through the use of survey weights. HR and 95% CI were calculated after adjusting for age, sex, race/ethnicity, education, income, smoking, drinking, family history of cardiovascular disease, and family history of diabetes under the Weibull regression model.

<sup>b</sup> Other race included non-Hispanic Asian, American Indian or Alaska Native, and Native Hawaiian or Pacific Islander.

**eFigure 5. Adjusted HR of All-Cause Mortality by Sociodemographic Factors Comparing Quintile 1 (Q1) With Quintile 3 (Q3) of BRI in US Adults From the NHANES Linked Mortality Files, 1999 to 2018, After Adjusting For Only Age and Sex (Left Panel),<sup>a</sup> and in Partially Adjusted Model (Right Panel).<sup>b</sup>**

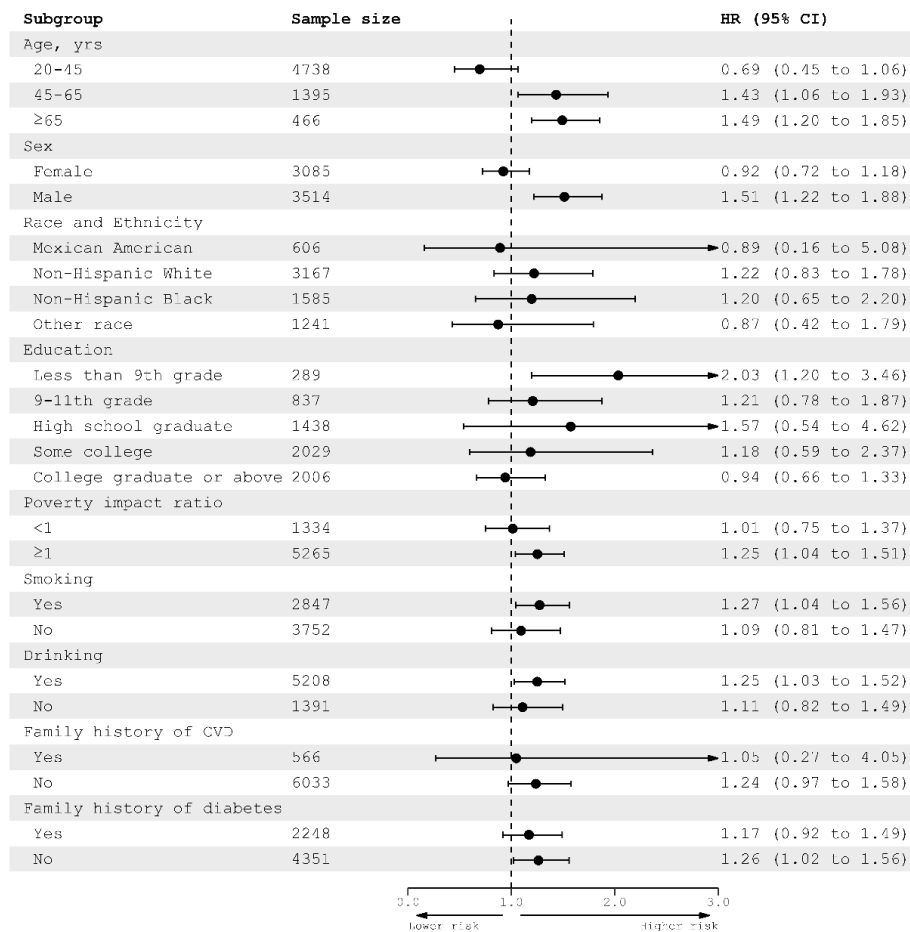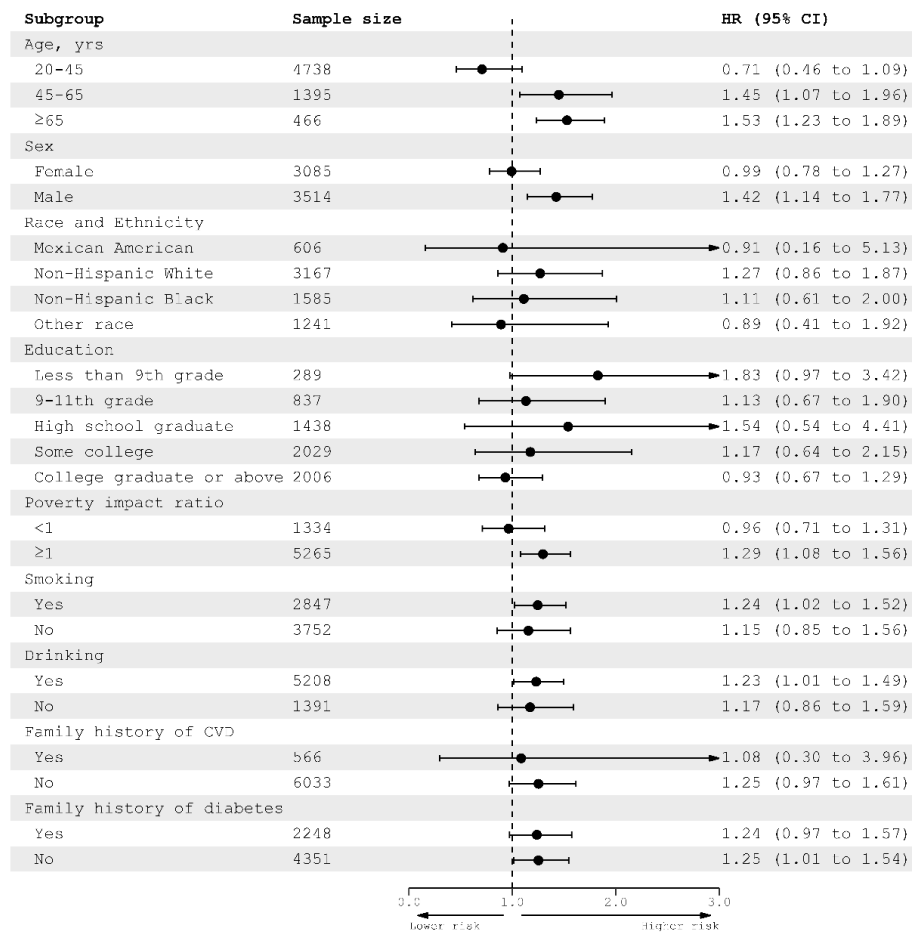

Abbreviations: BRI, body roundness index; NHANES, National Health and Nutrition Examination Survey; HR, hazard ratio; 95% CI, 95% confidence interval; CVD, cardiovascular disease.

<sup>a</sup> Estimates were nationally representative through the use of survey weights. HR and 95% CI were calculated after adjusting for age and sex under the Weibull regression model.

<sup>b</sup> Estimates were nationally representative through the use of survey weights. HR and 95% CI were calculated after adjusting for age, sex, race/ethnicity, education, and income under the Weibull regression model.

<sup>c</sup> Other race included non-Hispanic Asian, American Indian or Alaska Native, and Native Hawaiian or Pacific Islander.

**eFigure 6. Adjusted HR of All-Cause Mortality by Sociodemographic Factors Comparing Quintile 1 (Q5) With Quintile 3 (Q3) of BRI in US Adults From the NHANES Linked Mortality Files, 1999 to 2018, After Adjusting For Only Age and Sex (Left Panel),<sup>a</sup> and in Partially Adjusted Model (Right Panel).<sup>b</sup>**

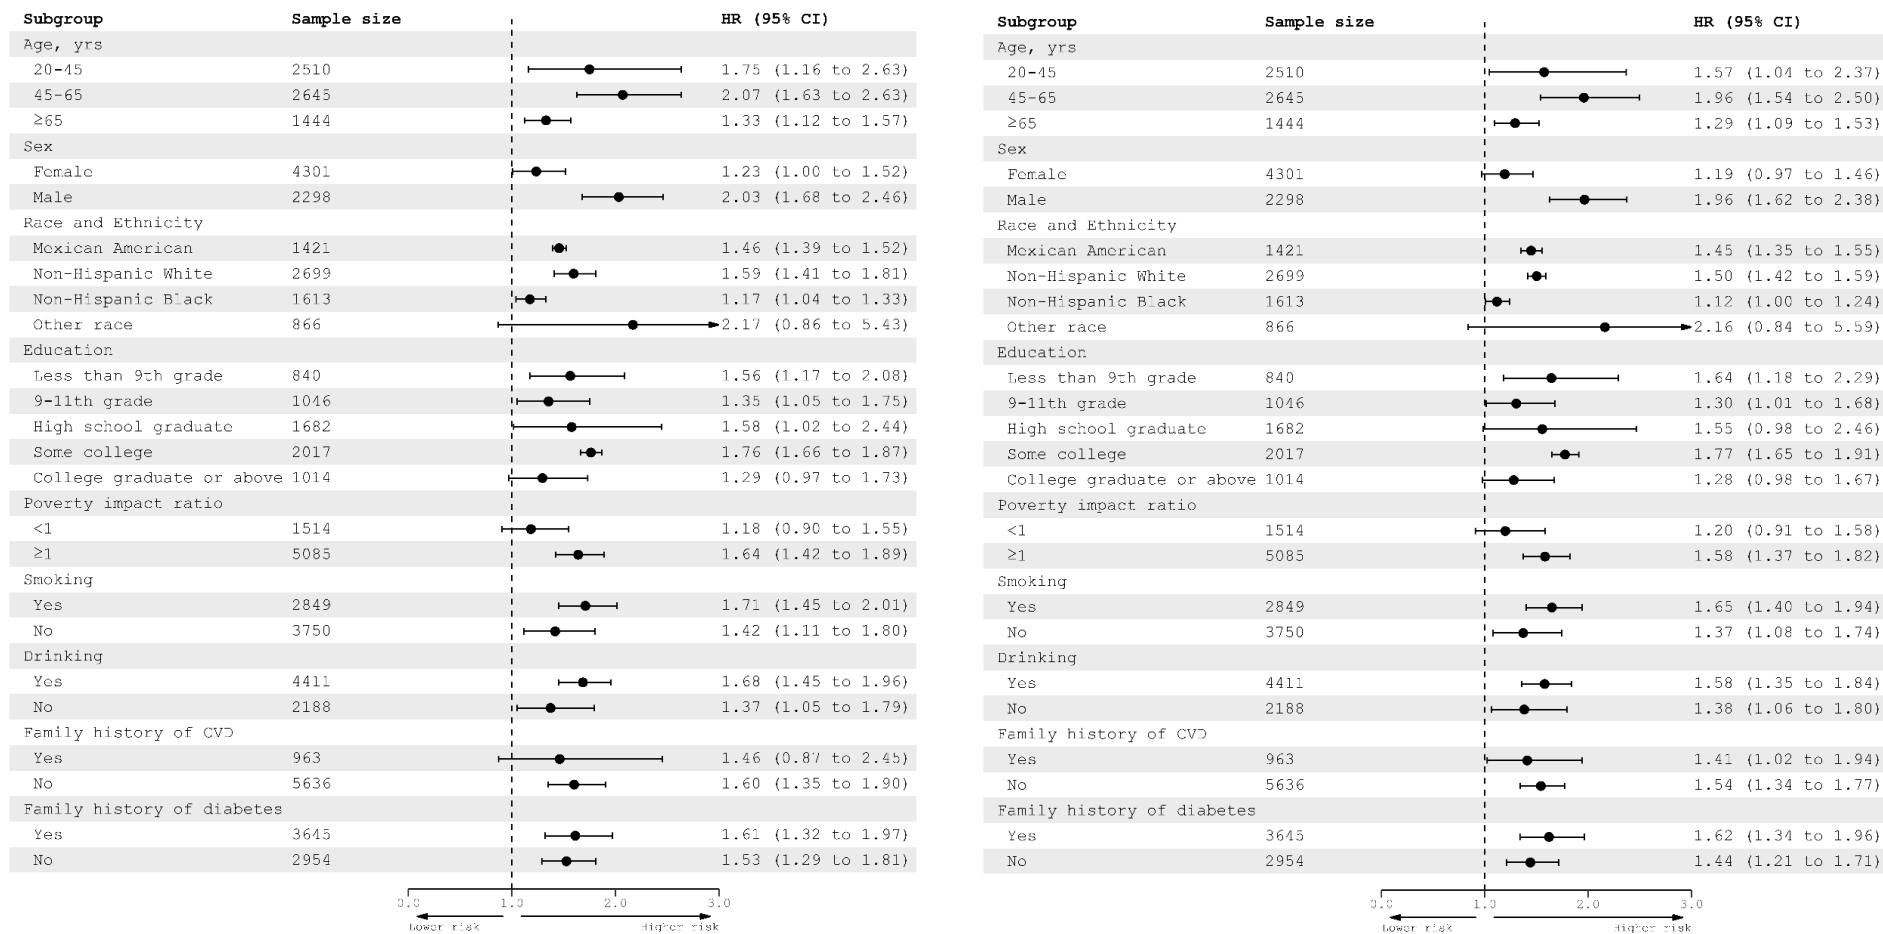

Abbreviations: BRI, body roundness index; NHANES, National Health and Nutrition Examination Survey; HR, hazard ratio; 95% CI, 95% confidence interval; CVD, cardiovascular disease.

<sup>a</sup> Estimates were nationally representative through the use of survey weights. HR and 95% CI were calculated after adjusting for age and sex under the Weibull regression model.

<sup>b</sup> Estimates were nationally representative through the use of survey weights. HR and 95% CI were calculated after adjusting for age, sex, race/ethnicity, education, and income under the Weibull regression model.

<sup>c</sup> Other race included non-Hispanic Asian, American Indian or Alaska Native, and Native Hawaiian or Pacific Islander.

**eFigure 7.** The relationship between body mass index and all-cause mortality risk after full adjustment.

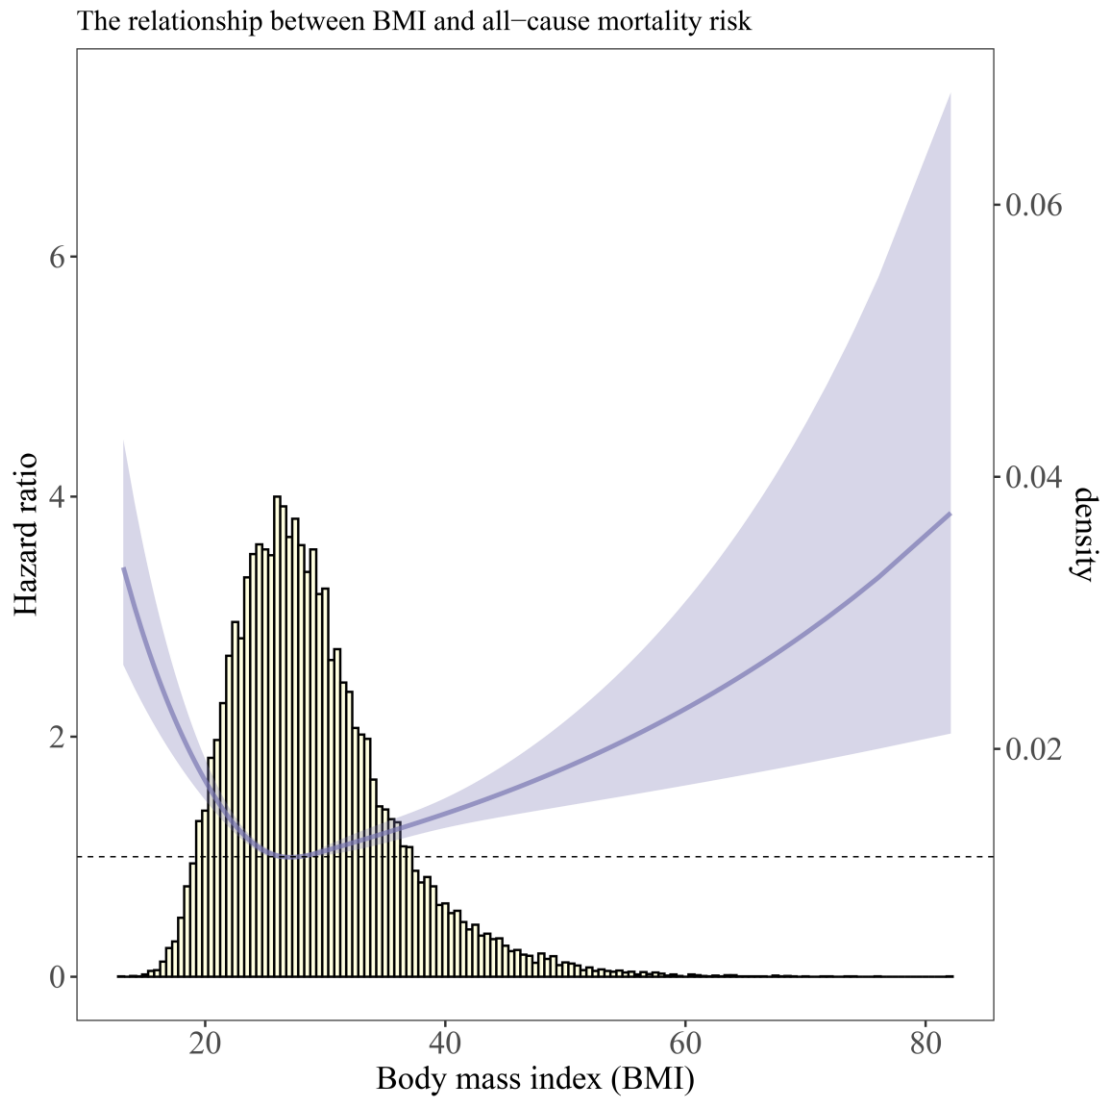

The solid curve line represents the effect-size estimates for the association of BMI with all-cause mortality, and the light shadow represents the 95% confidence interval.
