# Supplementary material for: Body Roundness Index and All-Cause Mortality Among US Adults
Source: PubMed Central journal article supplement (PMC11154161; doi:10.1001/jamanetworkopen.2024.15051), 2024-06-05
Supplement: jamanetwopen-e2415051-s002.pdf [file jamanetwopen-e2415051-s002.pdf]

## Data Sharing Statement

Zhang. Body Roundness Index and All-Cause Mortality Among US Adults. *JAMA Netw Open*.  
Published June 05, 2024. doi:10.1001/jamanetworkopen.2024.15051

### Data

**Data available:** No
